# Supplementary material for: Oncogenic mutations and dysregulated pathways in obesity-associated hepatocellular carcinoma
Source: PubMed Central journal article supplement — Oncogene. 2016 May 2;35(49):6271–80. doi: 10.1038/onc.2016.162 (PMC5153568; doi:10.1038/onc.2016.162), 2016-05-02
Supplement: onc2016162x1.pdf [file onc2016162x1.pdf]

## Supplementary Figures

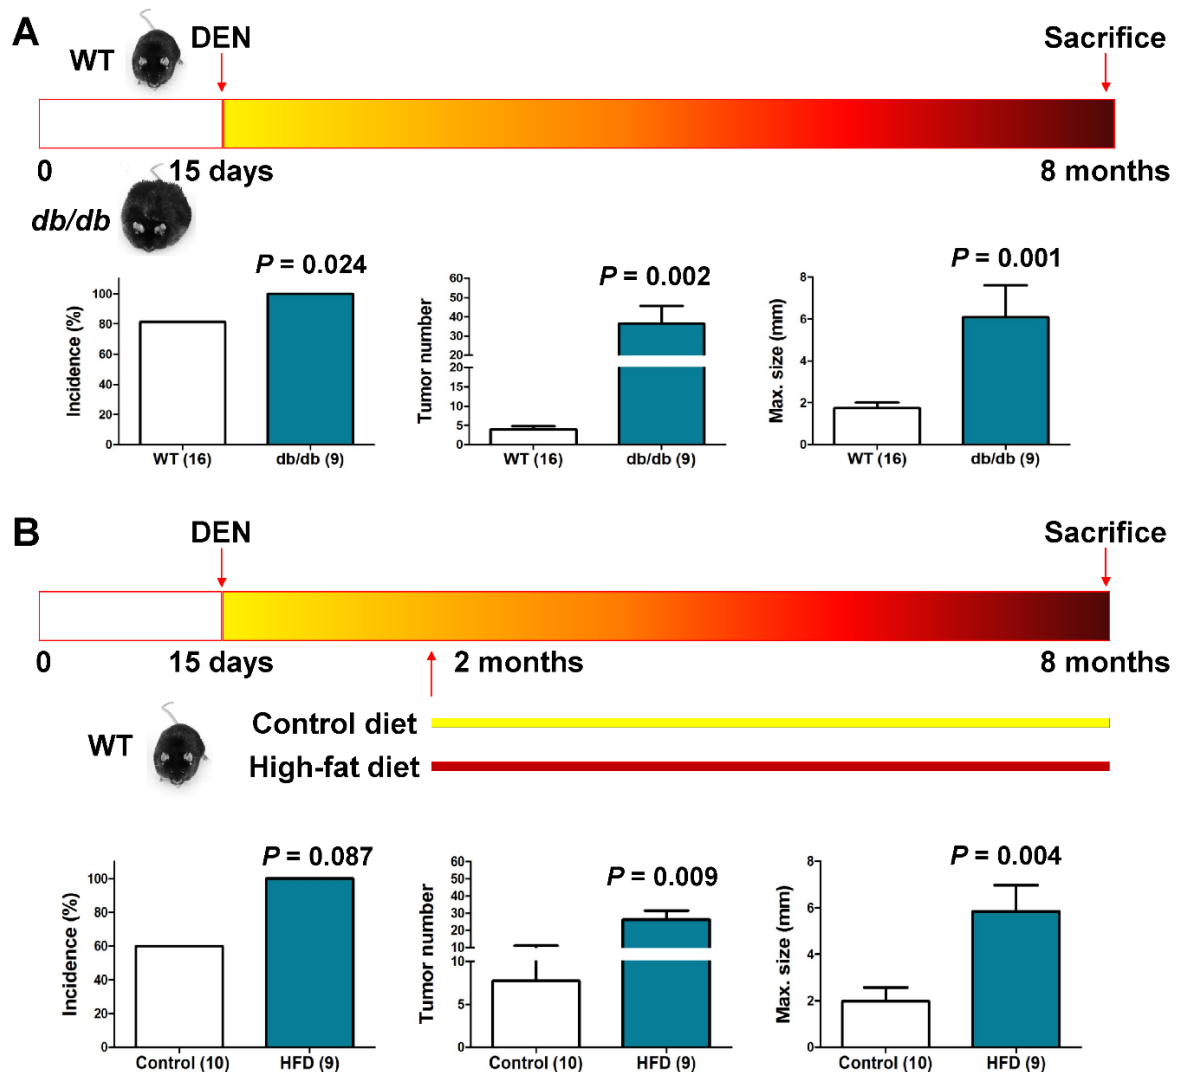

**Supplementary Figure 1** Genetic and dietary obesity increases susceptibility to DEN-induced hepatocarcinogenesis in mice. **(A)** Wild-type (WT) and genetic obese (*db/db*) mice received DEN (5 mg/kg, intra-peritoneal injection) at day 13 to 15. Mice were sacrificed at 8 months of age. HCC incidence, number of HCCs per mouse and maximal size of the tumors were counted. **(B)** C57BL/6 mice fed with high fat diet (HFD) or normal chow till 8 months of age. HCC incidence, number of HCCs per mouse and maximal size of the tumor were counted.

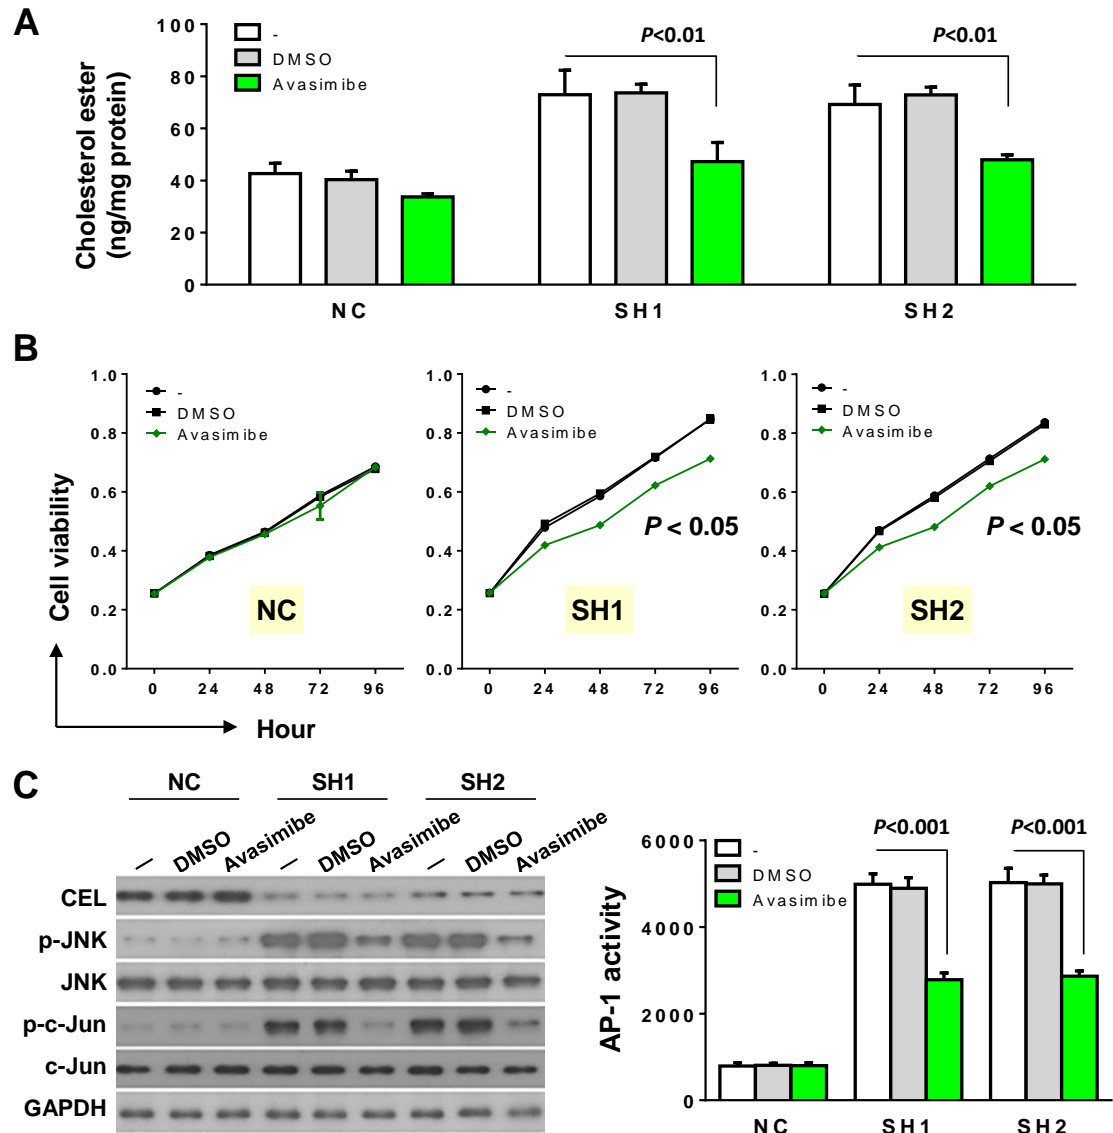

**Supplementary Figure 2** Reducing cholesteryl ester by drug treatment counteracts the effect of *CEL* knock-down. **(A)** Treatment with Avasimibe, an inhibitor of the cholesterol esterification enzyme ACAT, significantly reduced the level of cholesterol ester in MIHA cells. **(B)** Consistent with the reduction of cholesterol ester, Avasimibe treatment significantly inhibited cell growth of *CEL* knock-down MIHA cells. **(C)** Avasimibe suppressed the signaling cascade and AP-1 activity induced by knock-down of *CEL*. Data are means $\pm$ SD. NC, negative control; SH1&SH2, shRNAs targeting *CEL*.

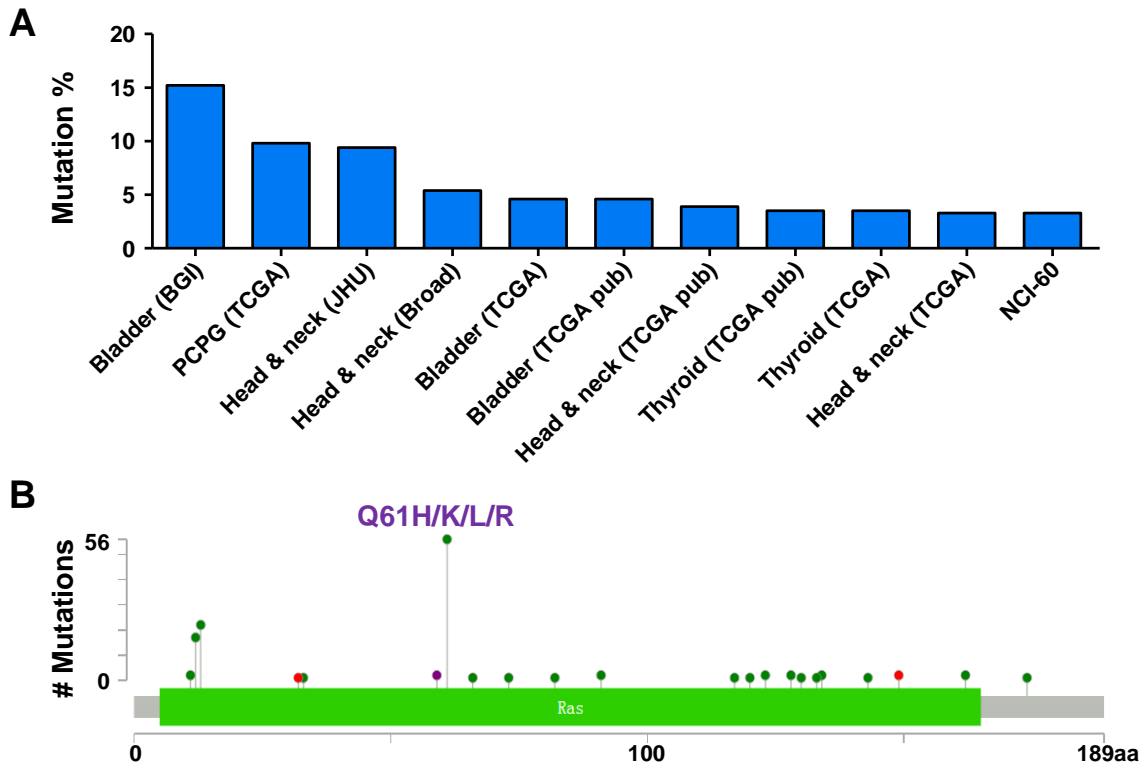

**Supplementary Figure 3** Mutations in human *HRAS* in TCGA database. **(A)** Mutation frequencies of *HRAS* in selected TCGA studies. **(B)** Codon 61 of *HRAS* is a mutation hot spot in human cancers. Data are from cBioPortal for Cancer Genomics (May 2015).
