# Supplementary material for: Oncogenic mutations and dysregulated pathways in obesity-associated hepatocellular carcinoma
Source: PubMed Central journal article supplement — Oncogene. 2016 May 2;35(49):6271–80. doi: 10.1038/onc.2016.162 (PMC5153568; doi:10.1038/onc.2016.162), 2016-05-02
Supplement: onc2016162x2.pdf [file onc2016162x2.pdf]

## Supplementary Tables

**Supplementary Table 1. Enrichment of Kyoto Encyclopedia of Genes and Genomes (KEGG) Pathways in Mutated Genes during Hepatocellular Carcinoma Development in Genetically Obese Mice and Wild-Type Mice**

| Group               | KEGG Pathways                          | NG <sup>a</sup> | adjP <sup>b</sup> | Mutated genes                                                                       | Notes                                                      |
|---------------------|----------------------------------------|-----------------|-------------------|-------------------------------------------------------------------------------------|------------------------------------------------------------|
| Obese<br>(db/db)    | Calcium signaling                      | 9 (178)         | 3.32E-06          | <i>Adcy4, Cacna1a, Itpr3, Pdgfra, Plce1, Prkca, Ryr2, Tacr1, Tbx2r</i>              | Regulation of cellular events in tumorigenesis.            |
|                     | Gap junction                           | 6 (88)          | 3.50E-05          | <b><i>Hras</i></b> , <i>Adcy4, Itpr3, Pdgfra, Prkca, Sos1</i>                       | Regulation of cell growth and differentiation              |
|                     | Focal adhesion                         | 6 (200)         | 0.0008            | <b><i>Hras</i></b> , <i>Flt4, Lama3, Pdgfra, Prkca, Sos1</i>                        | Cell motility, proliferation, differentiation and survival |
|                     | Cytokine-cytokine receptor interaction | 5 (245)         | 0.0071            | <i>Ccr9, Flt4, Il10ra, Il5, Pdgfra</i>                                              | Cancer-related pathway                                     |
|                     | GnRH signaling pathway <sup>c</sup>    | 5 (99)          | 0.0003            | <b><i>Hras</i></b> , <i>Adcy4, Itpr3, Prkca, Sos1</i>                               | Cancer proliferation, metastasis, and angiogenesis         |
|                     | Chemokine signaling                    | 4 (185)         | 0.0125            | <b><i>Hras</i></b> , <i>Adcy4, Ccr9, Sos1</i>                                       | Tumor survival, metastasis and neovascularization.         |
|                     | MAPK signaling pathway <sup>d</sup>    | 8 (268)         | 0.0002            | <b><i>Hras</i></b> , <i>Cacna1a, Cacna2d2, Cacna2d4, Pdgfra, Prkca, Ptpn5, Sos1</i> | Cell proliferation, differentiation and migration          |
|                     | Pathways in cancer                     | 6 (325)         | 0.0054            | <b><i>Hras</i></b> , <i>Brca2, Lama3, Pdgfra, Prkca, Sos1</i>                       | Cancer related pathway                                     |
| Lean<br>(wild-type) | MAPK signaling pathway                 | 4 (268)         | 0.0342            | <i>Cacna1f, Cdc25b, Mecom, Nfkb2</i>                                                | Cell proliferation, differentiation and migration          |
|                     | Pathways in cancer                     | 7 (325)         | 0.0026            | <i>Arnt2, Ctnna2, Cyct, Dvl3, Mecom, Msh2, Nfkb2</i>                                | Cancer related pathway                                     |

<sup>a</sup> NG, number of annotated genes in the input list (number of annotated genes in the reference list; <sup>b</sup> adjP, p value adjusted by the multiple test adjustment; <sup>c</sup> GnRH, gonadotropin-releasing hormone; <sup>d</sup> MAPK, mitogen-activated protein kinase.

**Supplementary Table 2. Mutations in CEL identified in TCGA HCC associated with nutritional factors or viruses infection**

| #  | HCC associated with nutritional factors only |           | HCC associated with viruses infection only |           |
|----|----------------------------------------------|-----------|--------------------------------------------|-----------|
|    | bcr_patient_barcode                          | Mutations | bcr_patient_barcode                        | Mutations |
| 1  | TCGA-BC-A10S                                 | Arg156Cys | TCGA-DD-A114                               |           |
| 2  | TCGA-BC-A10U                                 |           | TCGA-DD-A116                               |           |
| 3  | TCGA-BC-A10Y                                 |           | TCGA-DD-A119                               |           |
| 4  | TCGA-BC-A110                                 | Arg156Cys | TCGA-DD-A1EA                               |           |
| 5  | TCGA-BC-A112                                 |           | TCGA-DD-A1EE                               |           |
| 6  | TCGA-DD-A115                                 |           | TCGA-DD-A1EH                               |           |
| 7  | TCGA-DD-A11B                                 |           | TCGA-DD-A1EI                               |           |
| 8  | TCGA-DD-A11D                                 |           | TCGA-EP-A12J                               |           |
| 9  | TCGA-BC-A217                                 |           | TCGA-DD-A1EL                               |           |
| 10 | TCGA-DD-A1E9                                 |           | TCGA-FV-A23B                               |           |
| 11 | TCGA-DD-A1ED                                 |           | TCGA-G3-A25T                               |           |
| 12 | TCGA-EP-A26S                                 |           | TCGA-G3-A25U                               |           |
| 13 | TCGA-G3-A25S                                 |           | TCGA-G3-A25X                               |           |
| 14 | TCGA-G3-A25V                                 |           | TCGA-G3-A25Y                               |           |
| 15 | TCGA-BC-A3KG                                 | Ala321Ser | TCGA-G3-A25Z                               |           |
| 16 | TCGA-BD-A2L6                                 |           | TCGA-ES-A2HT                               |           |
| 17 | TCGA-CC-A3M9                                 |           | TCGA-G3-A3CG                               |           |
| 18 | TCGA-CC-A3MA                                 |           | TCGA-G3-A3CJ                               |           |
| 19 | TCGA-DD-A39Z                                 |           | TCGA-G3-A3CK                               |           |
| 20 | TCGA-EP-A3JL                                 |           | TCGA-G3-A3CH                               |           |
| 21 | TCGA-G3-A3CI                                 |           | TCGA-FV-A495                               |           |
| 22 | TCGA-CC-A3MC                                 |           | TCGA-FV-A4ZQ                               |           |
| 23 | TCGA-EP-A3RK                                 |           | TCGA-BW-A5NO                               |           |
| 24 | TCGA-FV-A2QQ                                 |           | TCGA-BW-A5NP                               |           |
| 25 | TCGA-FV-A3I1                                 |           | TCGA-DD-A4NF                               |           |
| 26 | TCGA-FV-A4ZP                                 |           | TCGA-G3-A5SI                               |           |
| 27 | TCGA-BW-A5NQ                                 |           | TCGA-G3-A5SK                               |           |
| 28 | TCGA-DD-A4NG                                 |           | TCGA-DD-A4NO                               |           |
| 29 | TCGA-DD-A4NH                                 |           | TCGA-DD-A4NQ                               |           |
| 30 | TCGA-DD-A4NJ                                 |           | TCGA-K7-A5RF                               |           |
| 31 | TCGA-G3-A5SL                                 |           | TCGA-DD-A73D                               |           |
| 32 | TCGA-BC-A5W4                                 |           | TCGA-MI-A75C                               |           |
| 33 | TCGA-CC-A5UC                                 |           | TCGA-MI-A75H                               |           |
| 34 | TCGA-CC-A5UD                                 |           | TCGA-MI-A75I                               |           |
| 35 | TCGA-CC-A5UE                                 |           | TCGA-QA-A7B7                               |           |
| 36 | TCGA-NI-A4U2                                 |           | TCGA-UB-A7ME                               |           |
| 37 | TCGA-BC-A69H                                 |           | TCGA-UB-A7MF                               |           |
| 38 | TCGA-DD-A4NS                                 |           | TCGA-G3-A7M6                               |           |

|    | HCC associated with nutritional factors only |           | HCC associated with viruses infection only |           |
|----|----------------------------------------------|-----------|--------------------------------------------|-----------|
| #  | bcr_patient_barcode                          | Mutations | bcr_patient_barcode                        | Mutations |
| 39 | TCGA-DD-A4NV                                 |           | TCGA-KR-A7K2                               |           |
| 40 | TCGA-ED-A627                                 |           | TCGA-RC-A7S9                               |           |
| 41 | TCGA-ED-A66X                                 |           | TCGA-RG-A7D4                               |           |
| 42 | TCGA-DD-A73A                                 |           | TCGA-RC-A7SB                               |           |
| 43 | TCGA-T1-A6J8                                 |           | TCGA-RC-A7SF                               |           |
| 44 | TCGA-CC-A7IF                                 |           | TCGA-RC-A7SK                               |           |
| 45 | TCGA-CC-A7IG                                 |           | TCGA-CC-A9FU                               |           |
| 46 | TCGA-CC-A7IH                                 |           | TCGA-G3-AAV0                               |           |
| 47 | TCGA-CC-A7II                                 |           | TCGA-YA-A8S7                               |           |
| 48 | TCGA-G3-A6UC                                 |           | TCGA-G3-AAV1                               |           |
| 49 | TCGA-CC-A7IJ                                 |           | TCGA-G3-AAV4                               |           |
| 50 | TCGA-CC-A7IK                                 |           | TCGA-G3-AAV7                               |           |
| 51 | TCGA-CC-A7IL                                 |           | TCGA-RC-A7SH                               |           |
| 52 | TCGA-G3-A7M5                                 |           | TCGA-ZP-A9CZ                               |           |
| 53 | TCGA-G3-A7M8                                 |           | TCGA-ZP-A9D2                               |           |
| 54 | TCGA-G3-A7M7                                 |           | TCGA-3K-AAZ8                               |           |
| 55 | TCGA-CC-A8HT                                 |           | TCGA-5C-AAPD                               |           |
| 56 | TCGA-MR-A8JO                                 |           | TCGA-DD-AADP                               |           |
| 57 | TCGA-NI-A8LF                                 |           | TCGA-DD-AADW                               |           |
| 58 | TCGA-CC-A9FS                                 |           | TCGA-DD-AAC8                               |           |
| 59 | TCGA-CC-A9FV                                 |           | TCGA-DD-AAC9                               |           |
| 60 | TCGA-CC-A9FW                                 |           | TCGA-DD-AACA                               |           |
| 61 | TCGA-G3-AAV5                                 |           | TCGA-DD-AACB                               |           |
| 62 | TCGA-ZP-A9D0                                 |           | TCGA-DD-AACC                               |           |
| 63 | TCGA-2Y-A9GS                                 |           | TCGA-DD-AACD                               |           |
| 64 | TCGA-2Y-A9GV                                 |           | TCGA-DD-AACE                               |           |
| 65 | TCGA-2Y-A9GW                                 |           | TCGA-DD-AACF                               |           |
| 66 | TCGA-2Y-A9GX                                 |           | TCGA-DD-AACG                               |           |
| 67 | TCGA-2Y-A9H2                                 |           | TCGA-DD-AACH                               |           |
| 68 | TCGA-4R-AA8I                                 |           | TCGA-DD-AACK                               |           |
| 69 | TCGA-CC-A7IE                                 |           | TCGA-DD-AACL                               |           |
| 70 | TCGA-ED-A97K                                 |           | TCGA-DD-AACM                               |           |
| 71 | TCGA-UB-AA0U                                 |           | TCGA-DD-AACN                               |           |
| 72 | TCGA-ZP-A9CY                                 |           | TCGA-DD-AACO                               |           |
| 73 | TCGA-ZP-A9D1                                 |           | TCGA-DD-AACQ                               |           |
| 74 | TCGA-2Y-A9H6                                 |           | TCGA-DD-AACS                               |           |
| 75 | TCGA-2Y-A9H8                                 |           | TCGA-DD-AACT                               |           |
| 76 | TCGA-2Y-A9HB                                 |           | TCGA-DD-AACU                               |           |
| 77 | TCGA-DD-AACP                                 |           | TCGA-DD-AACY                               |           |
| 78 | TCGA-DD-AACV                                 |           | TCGA-DD-AAD0                               |           |

|     | HCC associated with nutritional factors only |           | HCC associated with viruses infection only |           |
|-----|----------------------------------------------|-----------|--------------------------------------------|-----------|
| #   | bcr_patient_barcode                          | Mutations | bcr_patient_barcode                        | Mutations |
| 79  | TCGA-DD-AADU                                 |           | TCGA-DD-AAD1                               |           |
| 80  | TCGA-DD-AAW2                                 |           | TCGA-DD-AAD2                               |           |
| 81  |                                              |           | TCGA-DD-AAD6                               |           |
| 82  |                                              |           | TCGA-DD-AAD8                               |           |
| 83  |                                              |           | TCGA-DD-AADA                               |           |
| 84  |                                              |           | TCGA-DD-AADB                               |           |
| 85  |                                              |           | TCGA-DD-AADC                               |           |
| 86  |                                              |           | TCGA-DD-AADD                               |           |
| 87  |                                              |           | TCGA-DD-AADE                               |           |
| 88  |                                              |           | TCGA-DD-AADF                               |           |
| 89  |                                              |           | TCGA-DD-AADI                               |           |
| 90  |                                              |           | TCGA-DD-AADK                               |           |
| 91  |                                              |           | TCGA-DD-AADY                               |           |
| 92  |                                              |           | TCGA-DD-AAE0                               |           |
| 93  |                                              |           | TCGA-DD-AAE1                               |           |
| 94  |                                              |           | TCGA-DD-AAE2                               |           |
| 95  |                                              |           | TCGA-DD-AAE4                               |           |
| 96  |                                              |           | TCGA-DD-AAE8                               |           |
| 97  |                                              |           | TCGA-DD-AAEE                               |           |
| 98  |                                              |           | TCGA-DD-AAEI                               |           |
| 99  |                                              |           | TCGA-DD-AAEK                               |           |
| 100 |                                              |           | TCGA-DD-AAVP                               |           |
| 101 |                                              |           | TCGA-DD-AAVQ                               |           |
| 102 |                                              |           | TCGA-DD-AAVR                               |           |
| 103 |                                              |           | TCGA-DD-AAVS                               |           |
| 104 |                                              |           | TCGA-DD-AAVU                               |           |
| 105 |                                              |           | TCGA-DD-AAVW                               |           |
| 106 |                                              |           | TCGA-DD-AAVX                               |           |
| 107 |                                              |           | TCGA-DD-AAVZ                               |           |
| 108 |                                              |           | TCGA-DD-AAW0                               |           |

**Supplementary Table 3. Whole-Exome Sequencing in NAFLD-HCCs**

| <b>Sample ID</b> | <b>Effective data (Mb)</b> | <b>Mean depth</b> | <b>Coverage (%)</b> |
|------------------|----------------------------|-------------------|---------------------|
| Db1-N            | 5055                       | 151               | 97.5                |
| Db1-T            | 5416                       | 165               | 97.6                |
| Db2-N            | 7007                       | 207               | 97.6                |
| Db2-T            | 7502                       | 183               | 97.6                |
|                  |                            |                   |                     |
| Wt1-N            | 4559                       | 141               | 97.7                |
| Wt1-T            | 5390                       | 158               | 97.8                |
| Wt2-N            | 5743                       | 174               | 97.8                |
| Wt2-T            | 9956                       | 237               | 97.8                |
| Mean             |                            | 177.0 ± 31.6      | 97.7 ± 0.1%         |

T, Tumor; N, non-tumor.

**Supplementary Table 4. Primer list**

| <b>Primer name</b> | <b>Nucleotide sequence (5'-&gt;3')</b>      | <b>Size/note</b>                        |
|--------------------|---------------------------------------------|-----------------------------------------|
| Cel-F1             | GTATGCACACACATGACCTT                        | 341 bp                                  |
| Cel-R1             | CATGTTGCACTGGGCTTCAT                        |                                         |
| Cel-F2             | GGCGGAAGTAGCCTCAGCTA                        | 1161 bp                                 |
| Cel-R2             | CCTGTCCCATAGTTTAGCTT                        |                                         |
| Cel-F3             | GCACATTGACTGTTAATCTCTA                      | 883 bp                                  |
| Cel-R3             | ACTGGAAGACATCTCTTTACTA                      |                                         |
| Cel-F4             | CCCTATCACTAGCTGATTGT                        | 731 bp                                  |
| Cel-R4             | GTTTAGTGAGCCAAGAGAACTA                      |                                         |
| Cel-F5             | CCACACAGATGCCTCTACTT                        | 349 bp                                  |
| Cel-R5             | GCTACCAAGGCTTGAGGATA                        |                                         |
| Cel-F6             | GCACATGAGCAGGAGAACT                         | 753 bp                                  |
| Cel-R6             | GCCAAGTGCCTGTCACCAT                         |                                         |
| Hras-F1            | CCTTGGCTAAGTGTGCTTCTC                       | 648 bp                                  |
| Hras-R1            | AAGACATAAAGCCTCAGTGTGC                      |                                         |
| Hras-F2            | TGTGCACACTGAGGCTTTATG                       | 453 bp                                  |
| Hras-R2            | CTGCGGTCTGGGAGACTTAC                        |                                         |
| Hras-F3            | CAGACAGCACCCCTTTTCTC                        | 236 bp                                  |
| Hras-R3            | CATCTGGCTAGCTGAGGTCAC                       |                                         |
| CEL D454E-F        | CAAATGGGTGGGGGCCGAGCATGCAGATGACAT<br>TCAG   | For site<br>directed<br>mutagene<br>sis |
| CEL D454E-R        | CTGCTGAATGTCATCTGCATGCTCGGCCCCAC<br>CCATTTG |                                         |
| CEL D555N-F        | GCGCTGCCACAGTGACCAACCAGGCGGCCAC<br>CCCTG    |                                         |
| CEL D555N-R        | CAGGGGTGGCCTCCTGGTTGGTCACTGTGGGC<br>AGCGC   |                                         |

**Supplementary Table 5. Antibodies used in this study**

| <b>Antibody</b>                          | <b>Cat. No.</b> | <b>Company</b>            | <b>Dilution</b> |
|------------------------------------------|-----------------|---------------------------|-----------------|
| Akt (5G3)                                | #2966           | Cell Signaling Technology | 1:1000          |
| Phospho-Akt (Thr308) (D25E6)             | #13038          | Cell Signaling Technology | 1:1000          |
| CEL (E-4)                                | sc377087        | Santa Cruz                | 1:250           |
| c-Jun (60A8)                             | #9165           | Santa Cruz                | 1:200           |
| Phospho-c-Jun (Ser63) (54B3)             | #2361           | Cell Signaling Technology | 1:1000          |
| ERK1/2                                   | sc-292838       | Santa Cruz                | 1:400           |
| GAPDH                                    | sc-25778        | Santa Cruz                | 1:500           |
| GRP78                                    | sc-13968        | Santa Cruz                | 1:500           |
| His-probe (H-15)                         | sc-803          | Santa Cruz                | 1:1000          |
| H-Ras (F235)                             | sc-29           | Santa Cruz                | 1:400           |
| IRE1 $\alpha$ (14C10)                    | #3294           | Cell Signaling Technology | 1:1000          |
| pIRE1a (ser725)                          | NB100-2323      | novusbio                  | 1:1000          |
| JNK                                      | #9252           | Cell Signaling Technology | 1:1000          |
| Phospho-SAPK/JNK (Thr183/Tyr185) (81E11) | #4668           | Cell Signaling Technology | 1:1000          |
| MEK1/2                                   | #9122           | Cell Signaling Technology | 1:400           |
| Phospho-MEK1/2 (Ser221) (166F8)          | #2338           | Cell Signaling Technology | 1:1000          |
| PI3-kinase p85 $\alpha$ (3H2838)         | sc-71892        | Santa Cruz                | 1:200           |
| Phospho-PI3 Kinase p85 (Tyr458)          | #4228           | Cell Signaling Technology | 1:1000          |
| PDK1 (C-20)                              | sc-7140         | Santa Cruz                | 1:500           |
| Phospho-PDK1 (Ser241) (C49H2)            | #3438           | Cell Signaling Technology | 1:1000          |
